# Supplementary material for: On the Utmost Importance of the Basis Set Choice for the Calculations of the Relativistic Corrections to NMR Shielding Constants
Source: MDPI journal article supplement (doi:10.3390/ijms24076231), 2023-03-25
Supplement: s1 [file s1]

## Supplementary Materials

### “On the utmost importance of the basis set choice for the calculations of the relativistic corrections to NMR shielding constants”

by Irina L. Rusakova<sup>1,\*</sup> and Yuriy Yu. Rusakov<sup>1</sup>

<sup>1</sup>A. E. Favorsky Irkutsk Institute of Chemistry, Siberian Branch of the Russian Academy of Sciences, Favorsky St. 1, Irkutsk 664033, Russia; i-rusakova@bk.ru

\*Correspondence: i-rusakova@bk.ru

**Table S1.** Equilibrium geometries of compounds **1-11** (4c-DFT-PBE0/dyall.av3z).

| Compound                                                          | Cartesian coordinates, Å |               |               |               |
|-------------------------------------------------------------------|--------------------------|---------------|---------------|---------------|
| Hydrogen Iodide,<br>HI ( <b>1</b> )                               | I                        | 0.0000000000  | 0.0000000000  | 0.0127425617  |
|                                                                   | H                        | 0.0000000000  | 0.0000000000  | -1.6045326659 |
| Iodomethane,<br>I-CH <sub>3</sub> ( <b>2</b> )                    | C                        | 0.0000000000  | 0.0000000000  | -1.9052037645 |
|                                                                   | I                        | 0.0000000000  | 0.0000000000  | 0.2333426888  |
|                                                                   | H                        | -1.0338368561 | 0.0000000000  | -2.2324642045 |
|                                                                   | H                        | 0.5169212092  | 0.8953306885  | -2.2324577549 |
|                                                                   | H                        | 0.5169212092  | -0.8953306885 | -2.2324577549 |
| Methylstibine,<br>SbH <sub>2</sub> -CH <sub>3</sub> ( <b>3</b> )  | Sb                       | 0.2427384235  | 0.0000000000  | 0.0000000000  |
|                                                                   | H                        | 0.2844357907  | 1.1986695862  | 1.2243293174  |
|                                                                   | H                        | 0.2844357907  | 1.1986695862  | -1.2243293174 |
|                                                                   | H                        | -2.3799422027 | 0.8314551488  | 0.0000000000  |
|                                                                   | H                        | -2.2284480020 | -0.7048561422 | 0.8859933219  |
|                                                                   | H                        | -2.2284480020 | -0.7048561422 | -0.8859933219 |
|                                                                   | C                        | -1.9192491803 | -0.1527763628 | 0.0000000000  |
| Methylindium,<br>InH <sub>2</sub> -CH <sub>3</sub> ( <b>4</b> )   | In                       | -0.0005145283 | 0.2409122207  | 0.0000000000  |
|                                                                   | C                        | -0.0008385651 | -1.9159081417 | 0.0000000000  |
|                                                                   | H                        | 1.5047072932  | 1.0994180584  | 0.0000000000  |
|                                                                   | H                        | -1.4837396258 | 1.1349717045  | 0.0000000000  |
|                                                                   | H                        | -1.0114894873 | -2.3205671015 | 0.0000000000  |
|                                                                   | H                        | 0.5295843648  | -2.2841258719 | 0.8800071003  |
|                                                                   | H                        | 0.5295843648  | -2.2841258719 | -0.8800071003 |
| Methylstannane,<br>SnH <sub>3</sub> -CH <sub>3</sub> ( <b>5</b> ) | Sn                       | 0.2288310864  | 0.0000000000  | 0.0000000000  |
|                                                                   | H                        | 0.8180434645  | -1.6076173192 | 0.0000000000  |
|                                                                   | H                        | 0.8181989878  | 0.8032132029  | 1.3925358462  |
|                                                                   | H                        | 0.8181989878  | 0.8032132029  | -1.3925358462 |
|                                                                   | H                        | -2.2871508866 | -0.5120010986 | 0.8865074431  |
|                                                                   | H                        | -2.2871508866 | -0.5120010986 | -0.8865074431 |
|                                                                   | H                        | -2.2880756311 | 1.0236019575  | 0.0000000000  |
|                                                                   | C                        | -1.9162435334 | 0.0001336337  | 0.0000000000  |
| TeH-CH <sub>3</sub> ( <b>6</b> )                                  | Te                       | 0.2279787598  | 0.0000000000  | 0.0000000000  |
|                                                                   | C                        | -1.9187735817 | 0.1038266059  | 0.0000000000  |
|                                                                   | H                        | 0.2530965313  | -1.6628486946 | 0.0000000000  |
|                                                                   | H                        | -2.3106113708 | -0.3676840201 | 0.8959758984  |
|                                                                   | H                        | -2.3106113708 | -0.3676840201 | -0.8959758984 |
|                                                                   | H                        | -2.1712809202 | 1.1619710864  | 0.0000000000  |

|                                                                                                                                                   |    |               |               |               |
|---------------------------------------------------------------------------------------------------------------------------------------------------|----|---------------|---------------|---------------|
| 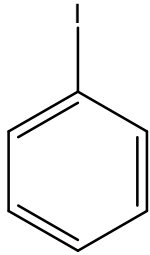 <p>1-iodobenzene,<br/><math>C_6H_5I</math> (<b>7</b>)</p>       | C  | -0.7685228594 | -0.0000169532 | 0.0000000000  |
|                                                                                                                                                   | C  | -1.4468094324 | -1.2063676888 | 0.0000000000  |
|                                                                                                                                                   | C  | -2.8324220220 | -1.1981783128 | 0.0000000000  |
|                                                                                                                                                   | C  | -3.5270815944 | -0.0000846469 | 0.0000000000  |
|                                                                                                                                                   | C  | -2.8324785367 | 1.1980422049  | 0.0000000000  |
|                                                                                                                                                   | C  | -1.4468661577 | 1.2063023004  | 0.0000000000  |
|                                                                                                                                                   | I  | 1.3199726633  | 0.0000311056  | 0.0000000000  |
|                                                                                                                                                   | H  | -0.8950350525 | -2.1494079321 | 0.0000000000  |
|                                                                                                                                                   | H  | -3.3735811902 | -2.1482641458 | 0.0000000000  |
|                                                                                                                                                   | H  | -4.6198776189 | -0.0001065630 | 0.0000000000  |
|                                                                                                                                                   | H  | -3.3736871639 | 2.1481014416  | 0.0000000000  |
|                                                                                                                                                   | H  | -0.8951362240 | 2.1493693282  | 0.0000000000  |
|  <p>Stibinine,<br/><math>C_5H_5Sb</math> (<b>8</b>)</p>          | Sb | 0.8331406623  | 0.0000000000  | 0.0000000000  |
|                                                                                                                                                   | C  | -0.5818025971 | -1.4704546973 | 0.0000000000  |
|                                                                                                                                                   | C  | -1.9388534838 | -1.2398630674 | 0.0000000000  |
|                                                                                                                                                   | C  | -2.5686937430 | -0.0000459670 | 0.0000000000  |
|                                                                                                                                                   | C  | -1.9388840722 | 1.2397908267  | 0.0000000000  |
|                                                                                                                                                   | C  | -0.5818917706 | 1.4705807241  | 0.0000000000  |
|                                                                                                                                                   | H  | -0.2351991261 | -2.5086251186 | 0.0000000000  |
|                                                                                                                                                   | H  | -2.6009414113 | -2.1164423580 | 0.0000000000  |
|                                                                                                                                                   | H  | -3.6628657815 | -0.0000752515 | 0.0000000000  |
|                                                                                                                                                   | H  | -2.6010569058 | 2.1163159521  | 0.0000000000  |
|                                                                                                                                                   | H  | -0.2352717783 | 2.5087336737  | 0.0000000000  |
|  <p>Stannabenzene,<br/><math>C_5H_6Sn</math> (<b>9</b>)</p>    | Sn | -0.5919769348 | 0.0000000000  | -0.4937269834 |
|                                                                                                                                                   | C  | -0.6166383870 | 0.0000000000  | 1.5211275730  |
|                                                                                                                                                   | C  | 0.6150250877  | 0.0000000000  | 2.1468967775  |
|                                                                                                                                                   | C  | 1.8857056142  | 0.0000000000  | 1.5727812154  |
|                                                                                                                                                   | C  | 2.2226792257  | 0.0000000000  | 0.2197602815  |
|                                                                                                                                                   | C  | 1.3859106441  | 0.0000000000  | -0.8795186414 |
|                                                                                                                                                   | H  | -1.8876428623 | 0.0000000000  | -1.5744714665 |
|                                                                                                                                                   | H  | -1.5272429346 | 0.0000000000  | 2.1227105155  |
|                                                                                                                                                   | H  | 0.6010933489  | 0.0000000000  | 3.2462057391  |
|                                                                                                                                                   | H  | 2.7255977094  | 0.0000000000  | 2.2735489173  |
|                                                                                                                                                   | H  | 3.3016594649  | 0.0000000000  | 0.0088704459  |
|                                                                                                                                                   | H  | 1.8143427029  | 0.0000000000  | -1.8832942896 |
|                                                                                                                                                   |    |               |               |               |
|  <p>Phenylindium,<br/><math>C_6H_5InH_2</math> (<b>10</b>)</p> | C  | 0.0000000000  | -0.0000733231 | 0.7156708393  |
|                                                                                                                                                   | C  | 0.0000000000  | -1.1972688944 | 1.4306215071  |
|                                                                                                                                                   | C  | 0.0000000000  | -1.1998059859 | 2.8162596127  |
|                                                                                                                                                   | C  | 0.0000000000  | -0.0000327438 | 3.5094434109  |
|                                                                                                                                                   | C  | 0.0000000000  | 1.1997239296  | 2.8162302585  |
|                                                                                                                                                   | C  | 0.0000000000  | 1.1971426603  | 1.4305906223  |
|                                                                                                                                                   | In | 0.0000000000  | 0.0000326807  | -1.4043502560 |
|                                                                                                                                                   | H  | 0.0000000000  | -2.1543882316 | 0.8965442120  |
|                                                                                                                                                   | H  | 0.0000000000  | -2.1477451557 | 3.3623747102  |
|                                                                                                                                                   | H  | 0.0000000000  | -0.0000130114 | 4.6031407659  |
|                                                                                                                                                   | H  | 0.0000000000  | 2.1476797354  | 3.3623216930  |
|                                                                                                                                                   | H  | 0.0000000000  | 2.1542441849  | 0.8964747639  |
|                                                                                                                                                   | H  | 0.0000000000  | -1.5131417274 | -2.2247727601 |
|                                                                                                                                                   | H  | 0.0000000000  | 1.5133812216  | -2.2244476712 |

|                                                                                                                                |    |               |               |              |
|--------------------------------------------------------------------------------------------------------------------------------|----|---------------|---------------|--------------|
| 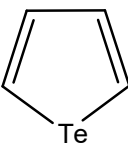<br>Tellurophene,<br>$C_4H_4Te$ ( <b>11</b> ) | Te | 0.6209543895  | 0.0000000000  | 0.0000000000 |
|                                                                                                                                | C  | -0.9209043405 | -1.3436783192 | 0.0000000000 |
|                                                                                                                                | C  | -2.1202532510 | -0.7090578290 | 0.0000000000 |
|                                                                                                                                | C  | -2.1202512276 | 0.7090740986  | 0.0000000000 |
|                                                                                                                                | C  | -0.9208953451 | 1.3436772290  | 0.0000000000 |
|                                                                                                                                | H  | -0.7522618495 | -2.4197265668 | 0.0000000000 |
|                                                                                                                                | H  | -3.0570402827 | -1.2756150788 | 0.0000000000 |
|                                                                                                                                | H  | -3.0570381356 | 1.2756406779  | 0.0000000000 |
|                                                                                                                                | H  | -0.7522375066 | 2.4197211363  | 0.0000000000 |

The notation “+  $nkl$ ” used in the Tables S2-S23 means adding  $n$  functions of  $k$ -type ( $k = s, p, d, \dots$ ) to previous basis set, with  $l$  designating a particular region within the angular space, namely,  $l = \text{“t”}$  or  $\text{“d”}$  for  $t = \text{“tight”}$  and  $d = \text{“diffuse”}$ .

**Table S2.** The dependence of the  $\alpha$ -HALA effect (in ppm) on the proton shielding constants of **1**, **3**, **4-6** on the basis set used on heavy atom.

| Basis set on heavy atom | $\alpha$ -HALA effect on $\sigma(^1H)$ |                                          |                                          |                                          |                            |
|-------------------------|----------------------------------------|------------------------------------------|------------------------------------------|------------------------------------------|----------------------------|
|                         | HI<br>(1)                              | SbH <sub>2</sub> -CH <sub>3</sub><br>(3) | InH <sub>2</sub> -CH <sub>3</sub><br>(4) | SnH <sub>3</sub> -CH <sub>3</sub><br>(5) | TeH-CH <sub>3</sub><br>(6) |
| dyall.v2z               | 11.5763                                | 1.9620                                   | -5.7555                                  | -0.2145                                  | 7.0771                     |
| +1st                    | 11.5765                                | 1.9618                                   | -5.7553                                  | -0.2146                                  | 7.0770                     |
| +2st                    | 11.5764                                | 1.9620                                   | -5.7555                                  | -0.2145                                  | 7.0767                     |
| +3st                    | 11.5762                                | 1.9620                                   | -5.7553                                  | -0.2146                                  | 7.0769                     |
| +1sd                    | 11.5800                                | 1.9716                                   | -5.759                                   | -0.2154                                  | 7.0828                     |
| +2sd                    | 11.5809                                | 1.9667                                   | -5.7595                                  | -0.2168                                  | 7.0825                     |
| +3sd                    | 11.5809                                | 1.9651                                   | -5.7593                                  | -0.2166                                  | 7.0815                     |
| +1pt                    | 11.5774                                | 1.9651                                   | -5.7599                                  | -0.2135                                  | 7.0831                     |
| +2pt                    | 11.5776                                | 1.9651                                   | -5.7600                                  | -0.2135                                  | 7.0832                     |
| +3pt                    | 11.5777                                | 1.9650                                   | -5.7600                                  | -0.2136                                  | 7.0832                     |
| +1pd                    | 11.3757                                | 1.9464                                   | -5.7564                                  | -0.2120                                  | 6.9978                     |
| +2pd                    | 11.3544                                | 1.9428                                   | -5.7539                                  | -0.2105                                  | 6.9983                     |
| +3pd                    | 11.3470                                | 1.9412                                   | -5.7567                                  | -0.2107                                  | 6.9961                     |
| +1dt                    | 11.3758                                | 1.9464                                   | -5.7599                                  | -0.2118                                  | 6.9962                     |
| +2dt                    | 11.3758                                | 1.9464                                   | -5.7599                                  | -0.2118                                  | 6.9962                     |
| +3dt                    | 11.3758                                | 1.9464                                   | -5.7599                                  | -0.2118                                  | 6.9962                     |
| +4dt                    | 11.3758                                | 1.9464                                   | -5.7599                                  | -0.2118                                  | 6.9962                     |
| +5dt                    | 11.3758                                | 1.9464                                   | -5.7599                                  | -0.2118                                  | 6.9962                     |
| +6dt                    | 11.3758                                | 1.9464                                   | -5.7599                                  | -0.2118                                  | 6.9962                     |
| +1dd                    | 11.3036                                | 1.9702                                   | -5.7572                                  | -0.2078                                  | 6.9740                     |
| +2dd                    | 11.3061                                | 1.9669                                   | -5.7546                                  | -0.2097                                  | 6.9770                     |
| +3dd                    | 11.3066                                | 1.9666                                   | -5.7535                                  | -0.2095                                  | 6.9749                     |
| +1ft                    | 11.2304                                | 1.9506                                   | -5.7686                                  | -0.2132                                  | 6.9340                     |
| +2ft                    | 11.2602                                | 1.9597                                   | -5.7703                                  | -0.2127                                  | 6.9617                     |
| +3ft                    | 11.2733                                | 1.9597                                   | -5.7653                                  | -0.2141                                  | 6.9586                     |
| +4ft                    | 11.2875                                | 1.9608                                   | -5.7644                                  | -0.2136                                  | 6.9661                     |
| +5ft                    | 11.2918                                | 1.9618                                   | -5.7635                                  | -0.2136                                  | 6.9668                     |

|      |         |        |         |         |        |
|------|---------|--------|---------|---------|--------|
| +1fd | 11.2481 | 1.9746 | -5.7582 | -0.1956 | 6.9714 |
| +2fd | 11.2399 | 1.9733 | -5.7584 | -0.1918 | 6.9717 |
| +3fd | 11.2397 | 1.9728 | -5.7585 | -0.1913 | 6.9744 |
| +4fd | 11.2397 | 1.9727 | -5.7589 | -0.1906 | 6.9745 |

**Table S3.** The dependence of the  $\alpha$ -HALA effect (in ppm) on the carbon shielding constants of **2**, **3**, **4-6** on the basis set used on heavy atom.

| Basis set on heavy atom | $\alpha$ -HALA effect on $\sigma(^{13}\text{C})$ |                                          |                                          |                                          |                            |
|-------------------------|--------------------------------------------------|------------------------------------------|------------------------------------------|------------------------------------------|----------------------------|
|                         | I-CH <sub>3</sub><br>(2)                         | SbH <sub>2</sub> -CH <sub>3</sub><br>(3) | InH <sub>2</sub> -CH <sub>3</sub><br>(4) | SnH <sub>3</sub> -CH <sub>3</sub><br>(5) | TeH-CH <sub>3</sub><br>(6) |
| dyall.v2z               | 26.4227                                          | 8.5135                                   | -8.8456                                  | -1.6108                                  | 21.1615                    |
| +1st                    | 26.4252                                          | 8.514                                    | -8.8476                                  | -1.6105                                  | 21.164                     |
| +2st                    | 26.4241                                          | 8.5129                                   | -8.8451                                  | -1.6107                                  | 21.1635                    |
| +3st                    | 26.421                                           | 8.5134                                   | -8.8478                                  | -1.6107                                  | 21.1611                    |
| +1sd                    | 26.4195                                          | 8.5272                                   | -8.8427                                  | -1.6234                                  | 21.1410                    |
| +2sd                    | 26.4438                                          | 8.5361                                   | -8.8455                                  | -1.6247                                  | 21.1203                    |
| +3sd                    | 26.4463                                          | 8.5328                                   | -8.8457                                  | -1.6248                                  | 21.1130                    |
| +1pt                    | 26.4488                                          | 8.5340                                   | -8.8435                                  | -1.6112                                  | 21.1225                    |
| +2pt                    | 26.4492                                          | 8.5342                                   | -8.8436                                  | -1.6112                                  | 21.1228                    |
| +3pt                    | 26.4513                                          | 8.5347                                   | -8.8436                                  | -1.6109                                  | 21.1228                    |
| +1pd                    | 25.8051                                          | 8.5186                                   | -8.869                                   | -1.6159                                  | 20.9318                    |
| +2pd                    | 25.8211                                          | 8.5270                                   | -8.8752                                  | -1.6170                                  | 20.9346                    |
| +3pd                    | 25.8354                                          | 8.5279                                   | -8.8713                                  | -1.6199                                  | 20.9378                    |
| +1dt                    | 25.8212                                          | 8.5186                                   | -8.8436                                  | -1.6193                                  | 20.9379                    |
| +2dt                    | 25.8212                                          | 8.5186                                   | -8.8435                                  | -1.6194                                  | 20.9379                    |
| +3dt                    | 25.8212                                          | 8.5187                                   | -8.8434                                  | -1.6194                                  | 20.9379                    |
| +4dt                    | 25.8213                                          | 8.5186                                   | -8.8434                                  | -1.6193                                  | 20.9379                    |
| +5dt                    | 25.8213                                          | 8.5186                                   | -8.8434                                  | -1.6193                                  | 20.9379                    |
| +6dt                    | 25.8212                                          | 8.5186                                   | -8.8434                                  | -1.6193                                  | 20.9379                    |
| +1dd                    | 25.8467                                          | 8.6031                                   | -8.8632                                  | -1.5227                                  | 20.9668                    |
| +2dd                    | 25.8532                                          | 8.6188                                   | -8.8679                                  | -1.5261                                  | 20.9629                    |
| +3dd                    | 25.8535                                          | 8.6183                                   | -8.8692                                  | -1.5253                                  | 20.9629                    |
| +1ft                    | 25.8804                                          | 8.6676                                   | -8.9206                                  | -1.5020                                  | 20.9552                    |
| +2ft                    | 25.8338                                          | 8.6592                                   | -8.9148                                  | -1.4982                                  | 20.9377                    |
| +3ft                    | 25.8263                                          | 8.6664                                   | -8.9144                                  | -1.5035                                  | 20.9318                    |
| +4ft                    | 25.8352                                          | 8.6637                                   | -8.9095                                  | -1.5014                                  | 20.9411                    |
| +5ft                    | 25.8406                                          | 8.6622                                   | -8.9135                                  | -1.5021                                  | 20.9357                    |
| +1fd                    | 25.9216                                          | 8.7350                                   | -8.9312                                  | -1.4461                                  | 21.0265                    |
| +2fd                    | 25.9264                                          | 8.7830                                   | -8.9459                                  | -1.4212                                  | 21.0524                    |
| +3fd                    | 25.9618                                          | 8.7855                                   | -8.9478                                  | -1.4205                                  | 21.0622                    |
| +4fd                    | 25.9646                                          | 8.7863                                   | -8.9464                                  | -1.4147                                  | 21.0630                    |

**Table S4.** The dependence of the  $\alpha$ -HALA effect (in ppm) on the proton shielding constants of **1, 3, 4-6** on the basis set used on hydrogen atoms.

| Basis set on hydrogen atoms | $\alpha$ -HALA effect on $\sigma(^1\text{H})$ |                                          |                                          |                                          |                            |
|-----------------------------|-----------------------------------------------|------------------------------------------|------------------------------------------|------------------------------------------|----------------------------|
|                             | HI<br>(1)                                     | SbH <sub>2</sub> -CH <sub>3</sub><br>(3) | InH <sub>2</sub> -CH <sub>3</sub><br>(4) | SnH <sub>3</sub> -CH <sub>3</sub><br>(5) | TeH-CH <sub>3</sub><br>(6) |
| dyall.v2z                   | 11.2397                                       | 1.9688                                   | -5.7575                                  | -0.2088                                  | 6.9796                     |
| +1st                        | 11.6598                                       | 2.0508                                   | -5.9522                                  | -0.1995                                  | 7.2469                     |
| +2st                        | 11.8480                                       | 2.0869                                   | -6.0446                                  | -0.1971                                  | 7.3644                     |
| +3st                        | 11.9102                                       | 2.0991                                   | -6.0732                                  | -0.1956                                  | 7.4057                     |
| +4st                        | 11.9391                                       | 2.1046                                   | -6.0875                                  | -0.1953                                  | 7.4240                     |
| +5st                        | 11.9482                                       | 2.1064                                   | -6.0916                                  | -0.1950                                  | 7.4298                     |
| +1sd                        | 11.9615                                       | 2.0890                                   | -6.0744                                  | -0.2067                                  | 7.3794                     |
| +2sd                        | 11.9594                                       | 2.0769                                   | -6.0736                                  | -0.2084                                  | 7.3774                     |
| +1pt                        | 11.9806                                       | 2.0976                                   | -6.0818                                  | -0.2112                                  | 7.3949                     |
| +2pt                        | 11.9818                                       | 2.0980                                   | -6.0825                                  | -0.2112                                  | 7.3962                     |
| +1pd                        | 12.0126                                       | 2.1127                                   | -6.1336                                  | -0.2739                                  | 7.4133                     |
| +2pd                        | 12.0035                                       | 2.1322                                   | -6.1958                                  | -0.2840                                  | 7.4239                     |
| +3pd                        | 11.9855                                       | 2.1167                                   | -6.2039                                  | -0.2808                                  | 7.4236                     |
| +1dt                        | 12.0105                                       | 2.1177                                   | -6.2136                                  | -0.2810                                  | 7.3890                     |
| +2dt                        | 12.0054                                       | 2.1175                                   | -6.2173                                  | -0.2823                                  | 7.3986                     |
| +1dd                        | 11.9040                                       | 2.1045                                   | -6.2187                                  | -0.2806                                  | 7.2968                     |
| +2dd                        | 11.8892                                       | 2.1044                                   | -6.2191                                  | -0.2797                                  | 7.2859                     |

**Table S5.** The dependence of the  $\alpha$ -HALA effect (in ppm) on the carbon shielding constants of **2, 3, 4-6** on the basis set used on carbon atom.

| Basis set on carbon atom | $\alpha$ -HALA effect on $\sigma(^{13}\text{C})$ |                                          |                                          |                                          |                            |
|--------------------------|--------------------------------------------------|------------------------------------------|------------------------------------------|------------------------------------------|----------------------------|
|                          | I-CH <sub>3</sub><br>(2)                         | SbH <sub>2</sub> -CH <sub>3</sub><br>(3) | InH <sub>2</sub> -CH <sub>3</sub><br>(4) | SnH <sub>3</sub> -CH <sub>3</sub><br>(5) | TeH-CH <sub>3</sub><br>(6) |
| dyall.v2z                | 25.8532                                          | 8.6037                                   | -8.8656                                  | -1.5261                                  | 20.9629                    |
| +1st                     | 26.6126                                          | 8.8889                                   | -8.9604                                  | -1.4220                                  | 21.5566                    |
| +2st                     | 26.9674                                          | 9.0196                                   | -9.0105                                  | -1.3764                                  | 21.8408                    |
| +3st                     | 27.077                                           | 9.0610                                   | -9.0238                                  | -1.3611                                  | 21.9291                    |
| +4st                     | 27.1295                                          | 9.0803                                   | -9.0312                                  | -1.3543                                  | 21.9712                    |
| +5st                     | 27.1407                                          | 9.0847                                   | -9.0324                                  | -1.3528                                  | 21.9803                    |
| +1sd                     | 27.0723                                          | 9.0779                                   | -9.0386                                  | -1.3619                                  | 21.9477                    |
| +2sd                     | 27.0751                                          | 9.0934                                   | -9.038                                   | -1.3719                                  | 21.9475                    |
| +1pt                     | 27.0023                                          | 9.0589                                   | -9.0714                                  | -1.4181                                  | 21.8929                    |
| +2pt                     | 26.9832                                          | 9.0479                                   | -9.0830                                  | -1.4310                                  | 21.8773                    |
| +1pd                     | 27.0851                                          | 9.0964                                   | -9.0897                                  | -1.4076                                  | 21.9961                    |
| +2pd                     | 27.0692                                          | 9.1111                                   | -9.0651                                  | -1.4038                                  | 22.0146                    |
| +3pd                     | 27.0578                                          | 9.1108                                   | -9.0690                                  | -1.4044                                  | 22.0316                    |
| +1dt                     | 27.0433                                          | 9.0966                                   | -9.0855                                  | -1.4165                                  | 21.9704                    |
| +2dt                     | 26.9384                                          | 9.1041                                   | -9.0475                                  | -1.4102                                  | 21.9361                    |
| +1dd                     | 26.8297                                          | 9.1377                                   | -9.1507                                  | -1.4131                                  | 21.9754                    |
| +2dd                     | 27.0307                                          | 9.1364                                   | -9.3301                                  | -1.5084                                  | 22.0800                    |

**Table S6.** Splitting of the  $\alpha$ -HALA effect (in ppm) on proton shielding constants of HI (**1**) on SO-HALA and SF-HALA contributions while expanding the basis set used on hydrogen atom.<sup>1</sup>

| Basis set on hydrogen atom | SF-HALA | SO-HALA | Total HALA |
|----------------------------|---------|---------|------------|
| dyall.v2z                  | -0.1587 | 11.4166 | 11.2579    |
| +1st                       | -0.1605 | 11.8420 | 11.6815    |
| +2st                       | -0.1628 | 12.0310 | 11.8682    |
| +3st                       | -0.1630 | 12.0941 | 11.9311    |
| +4st                       | -0.1635 | 12.1232 | 11.9597    |
| +5st                       | -0.1635 | 12.1324 | 11.9689    |
| +1sd                       | -0.1561 | 12.1430 | 11.9869    |
| +2sd                       | -0.1566 | 12.1419 | 11.9853    |
| +1pt                       | -0.1289 | 12.1372 | 12.0083    |
| +2pt                       | -0.1281 | 12.1376 | 12.0095    |
| +1pd                       | -0.1456 | 12.1816 | 12.0360    |
| +2pd                       | -0.1328 | 12.1641 | 12.0313    |
| +3pd                       | -0.1348 | 12.1384 | 12.0036    |
| +1dt                       | -0.1491 | 12.1575 | 12.0084    |
| +2dt                       | -0.1504 | 12.1521 | 12.0017    |
| +1dd                       | -0.1572 | 12.0568 | 11.8996    |
| +2dd                       | -0.1577 | 12.0391 | 11.8814    |

<sup>1</sup> The RKB balance is used.

**Table S7.** Splitting of the  $\alpha$ -HALA effect (in ppm) on carbon shielding constant of I-CH<sub>3</sub> (**2**) on SO-HALA and SF-HALA contributions while expanding the basis set used on carbon atom.<sup>1</sup>

| Basis set on hydrogen atom | SF-HALA | SO-HALA | Total HALA |
|----------------------------|---------|---------|------------|
| dyall.v2z                  | -3.8011 | 29.6787 | 25.8776    |
| +1st                       | -3.7752 | 30.4093 | 26.6341    |
| +2st                       | -3.7627 | 30.7540 | 26.9913    |
| +3st                       | -3.7591 | 30.8595 | 27.1004    |
| +4st                       | -3.7573 | 30.9105 | 27.1532    |
| +5st                       | -3.7568 | 30.9212 | 27.1644    |
| +1sd                       | -3.7669 | 30.8532 | 27.0863    |
| +2sd                       | -3.7590 | 30.8474 | 27.0884    |
| +1pt                       | -3.7931 | 30.8083 | 27.0152    |
| +2pt                       | -3.8046 | 30.8007 | 26.9961    |
| +1pd                       | -3.7925 | 30.8899 | 27.0974    |

|      |         |         |         |
|------|---------|---------|---------|
| +2pd | -3.7936 | 30.8773 | 27.0837 |
| +3pd | -3.8065 | 30.8755 | 27.0690 |
| +1dt | -3.7960 | 30.8505 | 27.0545 |
| +2dt | -3.8029 | 30.7332 | 26.9303 |
| +1dd | -3.8138 | 30.6491 | 26.8353 |
| +2dd | -3.8270 | 30.8720 | 27.0450 |

<sup>1</sup> The RKB balance is used.

**Table S8.** The dependencies of the  $\alpha$ -HALA effect (in ppm) from iodine atom on the  $\sigma(^1\text{H})$  and of the corresponding  $^1J_{\text{FC}}(^1\text{H}, ^{127}\text{I})$  (in Hz) in HI (**1**) on the basis set used on hydrogen atom (at that, dyall.av3z is set on the iodine atom).

| Basis set on hydrogen | $\alpha$ -HALA effect on $\sigma(^1\text{H})$ | $^1J_{\text{FC}}(^1\text{H}, ^{127}\text{I})$ |
|-----------------------|-----------------------------------------------|-----------------------------------------------|
| dyall.aac4z           | 11.9336                                       | -103.13                                       |
| aug-cc-pVTZ-J         | 11.9365                                       | -102.89                                       |
| ccJ-pVDZ              | 11.8548                                       | -102.78                                       |
| ccJ-pVTZ              | 11.905                                        | -102.71                                       |
| pcJ-1                 | 11.8695                                       | -103.71                                       |
| pcJ-2                 | 11.9507                                       | -103.26                                       |
| pecJ-1                | 11.8859                                       | -103.05                                       |
| pecJ-2                | 11.9389                                       | -102.84                                       |
| pcS-1                 | 10.1676                                       | -88.61                                        |
| pcS-2                 | 11.2615                                       | -97.13                                        |
| pecS-1                | 10.2744                                       | -88.19                                        |
| pecS-2                | 11.2597                                       | -96.87                                        |
| dyall.v2z             | 11.2511                                       | -97.87                                        |
| dyall.v3z             | 11.7724                                       | -101.60                                       |
| cc-pVDZ               | 10.1922                                       | -87.96                                        |
| cc-pVTZ               | 10.8867                                       | -93.23                                        |
| pc-1                  | 10.1607                                       | -88.59                                        |
| pc-2                  | 11.2578                                       | -97.14                                        |
| pecS-2_ext            | 11.9898                                       | -103.37                                       |
| pcS-2_ext             | 11.9986                                       | -103.68                                       |

**Table S9.** The dependencies of the  $\alpha$ -HALA effect (in ppm) from iodine atom on the  $\sigma(^{13}\text{C})$  and of the corresponding  $^1J_{\text{FC}}(^{13}\text{C}, ^{127}\text{I})$  (in Hz) in I-CH<sub>3</sub> (**2**) on the basis set used on carbon atom (at that, dyall.av3z is set on the iodine atom).

| Basis set on carbon | $\alpha$ -HALA effect on $\sigma(^{13}\text{C})$ | $^1J_{\text{FC}}(^{13}\text{C}, ^{127}\text{I})$ |
|---------------------|--------------------------------------------------|--------------------------------------------------|
| dyall.aac4z         | 26.8483                                          | -139.10                                          |
| aug-cc-pVTZ-J       | 27.5976                                          | -139.14                                          |
| ccJ-pVDZ            | 27.1733                                          | -138.45                                          |
| ccJ-pVTZ            | 27.055                                           | -139.01                                          |
| pcJ-1               | 27.1859                                          | -138.29                                          |
| pcJ-2               | 26.9246                                          | -138.93                                          |
| pecJ-1              | 26.5521                                          | -136.61                                          |
| pecJ-2              | 26.7008                                          | -138.25                                          |
| pcS-1               | 24.163                                           | -126.13                                          |
| pcS-2               | 25.8159                                          | -134.04                                          |

|            |         |         |
|------------|---------|---------|
| pecS-1     | 21.1931 | -115.58 |
| pecS-2     | 25.9445 | -134.24 |
| dyall.v2z  | 25.9648 | -134.39 |
| dyall.v3z  | 26.9079 | -137.93 |
| cc-pVDZ    | 26.1953 | -132.88 |
| cc-pVTZ    | 26.1072 | -134.23 |
| pc-1       | 24.5776 | -125.97 |
| pc-2       | 25.9025 | -134.04 |
| pecS-2_ext | 27.3143 | -139.37 |
| pcS-2_ext  | 27.1476 | -139.18 |

**Table S10.** The dependencies of the HALA effect (in ppm) from Sb atom on  $\sigma(^1\text{H})$  and  $\sigma(^{13}\text{C})$  and the corresponding  $J_{\text{FC}}(^1\text{H}, ^{121}\text{Sb})$  and  $^1J_{\text{FC}}(^{13}\text{C}, ^{121}\text{Sb})$  (in Hz) in  $\text{SbH}_2\text{-CH}_3$  (**3**) on the basis set used on hydrogen and carbon atoms, respectively. Dyall.av3z is set on Sb atom.

| Basis set on hydrogen or carbon atom | $\alpha$ -HALA on $\sigma(^1\text{H})$ | $^1J(^1\text{H}, ^{121}\text{Sb})$ | $\beta$ -HALA on $\sigma(^1\text{H})^1$ | $^2J(^1\text{H}, ^{121}\text{Sb})^1$ | $\alpha$ -HALA on $\sigma(^{13}\text{C})$ | $^1J(^{13}\text{C}, ^{121}\text{Sb})$ |
|--------------------------------------|----------------------------------------|------------------------------------|-----------------------------------------|--------------------------------------|-------------------------------------------|---------------------------------------|
| dyall.aae4z                          | 2.2166                                 | 63.07                              | -0.5276                                 | 18.58                                | 9.2551                                    | -113.90                               |
| aug-cc-pVTZ-J                        | 2.1723                                 | 62.78                              | -0.4910                                 | 18.51                                | 9.4335                                    | -114.02                               |
| ccJ-pVDZ                             | 2.0945                                 | 62.07                              | -0.4936                                 | 18.31                                | 9.2031                                    | -112.38                               |
| ccJ-pVTZ                             | 2.1354                                 | 62.59                              | -0.4997                                 | 18.42                                | 9.2375                                    | -113.74                               |
| pcJ-1                                | 2.1050                                 | 61.02                              | -0.4952                                 | 18.38                                | 9.1958                                    | -111.78                               |
| pcJ-2                                | 2.1589                                 | 62.52                              | -0.5079                                 | 18.48                                | 9.2023                                    | -113.70                               |
| pecJ-1                               | 2.1030                                 | 62.72                              | -0.4889                                 | 18.29                                | 9.0020                                    | -111.08                               |
| pecJ-2                               | 2.1265                                 | 62.81                              | -0.4947                                 | 18.45                                | 9.1468                                    | -112.86                               |
| pcS-1                                | 1.7761                                 | 51.68                              | -0.4402                                 | 15.60                                | 8.0027                                    | -101.85                               |
| pcS-2                                | 2.0225                                 | 58.63                              | -0.4858                                 | 17.39                                | 8.7158                                    | -109.68                               |
| pecS-1                               | 1.8481                                 | 53.79                              | -0.4490                                 | 15.40                                | 6.9795                                    | -93.83                                |
| pecS-2                               | 2.0261                                 | 58.94                              | -0.4755                                 | 17.36                                | 8.7799                                    | -109.85                               |
| dyall.v2z                            | 2.0117                                 | 59.02                              | -0.4791                                 | 17.39                                | 8.7871                                    | -109.86                               |
| dyall.v3z                            | 2.1362                                 | 61.67                              | -0.5027                                 | 18.21                                | 9.1419                                    | -112.96                               |
| cc-pVDZ                              | 1.7753                                 | 53.17                              | -0.4425                                 | 15.55                                | 8.8869                                    | -108.05                               |
| cc-pVTZ                              | 1.9323                                 | 57.14                              | -0.4668                                 | 16.78                                | 8.8541                                    | -109.84                               |
| pc-1                                 | 1.7751                                 | 51.70                              | -0.4413                                 | 15.64                                | 8.2090                                    | -101.97                               |
| pc-2                                 | 2.0209                                 | 58.63                              | -0.4862                                 | 17.39                                | 8.7576                                    | -109.68                               |
| pecS-2_ext                           | 2.1750                                 | 62.96                              | -0.4987                                 | 18.53                                | 9.3103                                    | -114.07                               |
| pcS-2_ext                            | 2.1707                                 | 62.83                              | -0.5096                                 | 18.55                                | 9.2176                                    | -113.90                               |

<sup>1</sup> The values calculated for the methyl protons are averaged.



**Table S11.** The dependencies of the HALA effect (in ppm) from In atom on  $\sigma(^1\text{H})$  and  $\sigma(^{13}\text{C})$  and the corresponding  $J_{\text{FC}}(^1\text{H}, ^{115}\text{In})$  and  $^1J_{\text{FC}}(^{13}\text{C}, ^{115}\text{In})$  (in Hz) in  $\text{InH}_2\text{-CH}_3$  (**4**) on the basis set used on hydrogen and carbon atom, respectively. Dyall.av3z is set on In atom.

| Basis set on hydrogen or carbon atom | $\alpha$ -HALA on $\sigma(^1\text{H})^1$ | $^1J(^1\text{H}, ^{115}\text{In})^1$ | $\beta$ -HALA on $\sigma(^1\text{H})^1$ | $^2J(^1\text{H}, ^{115}\text{In})^1$ | $\alpha$ -HALA on $\sigma(^{13}\text{C})$ | $^1J_{\text{FC}}(^{13}\text{C}, ^{115}\text{In})$ |
|--------------------------------------|------------------------------------------|--------------------------------------|-----------------------------------------|--------------------------------------|-------------------------------------------|---------------------------------------------------|
| dyall.aae4z                          | -6.1783                                  | 848.99                               | -0.4198                                 | -12.53                               | -9.1346                                   | 153.01                                            |
| aug-cc-pVTZ-J                        | -6.1593                                  | 845.93                               | -0.4092                                 | -12.45                               | -8.9209                                   | 153.03                                            |
| ccJ-pVDZ                             | -6.0979                                  | 833.97                               | -0.4135                                 | -12.05                               | -9.0084                                   | 153.62                                            |
| ccJ-pVTZ                             | -6.1389                                  | 841.10                               | -0.4115                                 | -12.40                               | -9.0344                                   | 153.05                                            |
| pcJ-1                                | -6.0800                                  | 835.20                               | -0.4076                                 | -11.99                               | -8.9412                                   | 153.80                                            |
| pcJ-2                                | -6.1452                                  | 844.55                               | -0.4155                                 | -12.52                               | -8.9940                                   | 152.44                                            |
| pecJ-1                               | -6.1323                                  | 838.20                               | -0.4158                                 | -12.36                               | -8.9722                                   | 151.85                                            |
| pecJ-2                               | -6.1595                                  | 842.61                               | -0.4108                                 | -12.45                               | -9.0039                                   | 152.64                                            |
| pcS-1                                | -5.2699                                  | 711.37                               | -0.3856                                 | -10.16                               | -8.5950                                   | 140.33                                            |
| pcS-2                                | -5.8116                                  | 793.74                               | -0.4060                                 | -11.74                               | -8.8937                                   | 147.08                                            |
| pecS-1                               | -5.2923                                  | 722.79                               | -0.3806                                 | -11.43                               | -8.1449                                   | 124.82                                            |
| pecS-2                               | -5.8181                                  | 794.72                               | -0.3996                                 | -11.76                               | -8.9289                                   | 147.47                                            |
| dyall.v2z                            | -5.8133                                  | 796.28                               | -0.4052                                 | -11.85                               | -8.8488                                   | 147.68                                            |
| dyall.v3z                            | -6.0633                                  | 833.31                               | -0.4122                                 | -12.36                               | -9.0387                                   | 151.58                                            |
| cc-pVDZ                              | -5.3057                                  | 713.65                               | -0.3951                                 | -10.18                               | -8.6275                                   | 146.69                                            |
| cc-pVTZ                              | -5.6399                                  | 765.33                               | -0.3963                                 | -11.32                               | -8.8237                                   | 147.71                                            |
| pc-1                                 | -5.2691                                  | 711.12                               | -0.3879                                 | -10.00                               | -8.3931                                   | 139.66                                            |
| pc-2                                 | -5.8103                                  | 793.72                               | -0.4066                                 | -11.74                               | -8.8517                                   | 147.09                                            |
| pecS-2_ext                           | -6.1725                                  | 848.58                               | -0.4087                                 | -12.63                               | -9.0706                                   | 153.04                                            |
| pcS-2_ext                            | -6.1700                                  | 848.27                               | -0.4158                                 | -12.59                               | -9.0690                                   | 152.71                                            |

<sup>1</sup> These values are averaged.

**Table S12.** The dependencies of the HALA effect (in ppm) from Sn atom on  $\sigma(^1\text{H})$  and  $\sigma(^{13}\text{C})$  and the corresponding  $J_{\text{FC}}(^1\text{H}, ^{119}\text{Sn})$  and  $^1J_{\text{FC}}(^{13}\text{C}, ^{119}\text{Sn})$  (in Hz) in  $\text{SnH}_3\text{-CH}_3$  (**5**) on the basis set used on hydrogen and carbon atom, respectively. Dyall.av3z is set on Sn atom.

| Basis set on hydrogen or carbon atom | $\alpha$ -HALA on $\sigma(^1\text{H})^1$ | $^1J(^1\text{H}, ^{119}\text{Sn})^1$ | $\beta$ -HALA on $\sigma(^1\text{H})^1$ | $^2J(^1\text{H}, ^{119}\text{Sn})^1$ | $\alpha$ -HALA on $\sigma(^{13}\text{C})$ | $^1J_{\text{FC}}(^{13}\text{C}, ^{119}\text{Sn})$ |
|--------------------------------------|------------------------------------------|--------------------------------------|-----------------------------------------|--------------------------------------|-------------------------------------------|---------------------------------------------------|
| dyall.aae4z                          | -0.1453                                  | -1184.59                             | -0.4521                                 | 19.71                                | -1.4226                                   | -132.44                                           |
| aug-cc-pVTZ-J                        | -0.1730                                  | -1180.23                             | -0.4209                                 | 19.62                                | -1.0853                                   | -132.33                                           |
| ccJ-pVDZ                             | -0.2091                                  | -1165.78                             | -0.4202                                 | 19.11                                | -1.3045                                   | -133.58                                           |
| ccJ-pVTZ                             | -0.2032                                  | -1174.30                             | -0.4253                                 | 19.58                                | -1.3303                                   | -132.42                                           |
| pcJ-1                                | -0.2101                                  | -1166.19                             | -0.4176                                 | 18.94                                | -1.2980                                   | -134.92                                           |
| pcJ-2                                | -0.1941                                  | -1178.10                             | -0.4277                                 | 19.74                                | -1.3557                                   | -131.86                                           |
| pecJ-1                               | -0.2053                                  | -1171.76                             | -0.4211                                 | 19.56                                | -1.3784                                   | -131.46                                           |
| pecJ-2                               | -0.2105                                  | -1176.73                             | -0.4222                                 | 19.64                                | -1.3678                                   | -132.16                                           |
| pcS-1                                | -0.2388                                  | -993.08                              | -0.3904                                 | 16.05                                | -1.7375                                   | -123.22                                           |
| pcS-2                                | -0.2073                                  | -1107.10                             | -0.4163                                 | 18.51                                | -1.5381                                   | -127.24                                           |
| pecS-1                               | -0.2230                                  | -1008.97                             | -0.3949                                 | 17.97                                | -2.0860                                   | -109.60                                           |

|            |         |          |         |       |         |         |
|------------|---------|----------|---------|-------|---------|---------|
| pecS-2     | -0.2132 | -1108.39 | -0.4107 | 18.51 | -1.5314 | -127.62 |
| dyall.v2z  | -0.2072 | -1111.04 | -0.4147 | 18.68 | -1.4558 | -128.03 |
| dyall.v3z  | -0.1967 | -1162.63 | -0.4254 | 19.45 | -1.3793 | -131.12 |
| cc-pVDZ    | -0.2352 | -997.87  | -0.3968 | 16.17 | -1.2068 | -127.11 |
| cc-pVTZ    | -0.2215 | -1068.48 | -0.4103 | 17.88 | -1.3747 | -127.74 |
| pc-1       | -0.2371 | -992.83  | -0.3938 | 15.84 | -1.4414 | -122.20 |
| pc-2       | -0.2061 | -1107.09 | -0.4195 | 18.50 | -1.4703 | -127.25 |
| pecS-2_ext | -0.1960 | -1183.62 | -0.4256 | 19.90 | -1.3030 | -132.40 |
| pcS-2_ext  | -0.1907 | -1183.31 | -0.4314 | 19.85 | -1.3392 | -132.09 |

<sup>1</sup> These values are averaged.

**Table S13.** The dependencies of the HALA effect (in ppm) from Te atom on  $\sigma(^1\text{H})$  and  $\sigma(^{13}\text{C})$  and the corresponding  $J_{\text{FC}}(^1\text{H}, ^{125}\text{Te})$  and  $^1J_{\text{FC}}(^{13}\text{C}, ^{125}\text{Te})$  (in Hz) in  $\text{TeH-CH}_3$  (**6**) on the basis set used on hydrogen and carbon atom, respectively. Dyall.av3z is set on Te atom.

| Basis set on hydrogen or carbon atom | $\alpha$ -HALA on $\sigma(^1\text{H})$ | $^1J(^1\text{H}, ^{125}\text{Te})$ | $\beta$ -HALA on $\sigma(^1\text{H})^1$ | $^2J(^1\text{H}, ^{125}\text{Te})^1$ | $\alpha$ -HALA on $\sigma(^{13}\text{C})$ | $^1J_{\text{FC}}(^{13}\text{C}, ^{125}\text{Te})$ |
|--------------------------------------|----------------------------------------|------------------------------------|-----------------------------------------|--------------------------------------|-------------------------------------------|---------------------------------------------------|
| dyall.aae4z                          | 7.3082                                 | 55.91                              | -0.5381                                 | -24.21                               | 21.7199                                   | 198.45                                            |
| aug-cc-pVTZ-J                        | 7.4957                                 | 55.83                              | -0.5828                                 | -24.13                               | 22.3493                                   | 198.56                                            |
| ccJ-pVDZ                             | 7.3660                                 | 55.77                              | -0.5662                                 | -23.79                               | 22.0091                                   | 196.88                                            |
| ccJ-pVTZ                             | 7.4114                                 | 55.63                              | -0.5718                                 | -23.99                               | 21.9487                                   | 198.26                                            |
| pcJ-1                                | 7.3628                                 | 56.99                              | -0.5695                                 | -23.87                               | 21.9920                                   | 196.27                                            |
| pcJ-2                                | 7.4141                                 | 56.12                              | -0.5849                                 | -24.09                               | 21.8527                                   | 198.14                                            |
| pecJ-1                               | 7.4128                                 | 55.89                              | -0.5590                                 | -23.87                               | 21.5480                                   | 194.39                                            |
| pecJ-2                               | 7.4428                                 | 55.80                              | -0.5686                                 | -24.02                               | 21.7252                                   | 197.01                                            |
| pcS-1                                | 6.2819                                 | 48.97                              | -0.4986                                 | -20.25                               | 19.5025                                   | 178.93                                            |
| pcS-2                                | 6.9771                                 | 52.94                              | -0.5572                                 | -22.66                               | 20.8872                                   | 191.15                                            |
| pecS-1                               | 6.3756                                 | 47.34                              | -0.5186                                 | -20.17                               | 17.1897                                   | 164.34                                            |
| pecS-2                               | 7.0278                                 | 52.72                              | -0.5520                                 | -22.64                               | 21.0264                                   | 191.48                                            |
| dyall.v2z                            | 6.9878                                 | 53.16                              | -0.5482                                 | -22.69                               | 21.0355                                   | 191.58                                            |
| dyall.v3z                            | 7.3253                                 | 55.33                              | -0.5844                                 | -23.75                               | 21.7743                                   | 196.79                                            |
| cc-pVDZ                              | 6.3121                                 | 47.71                              | -0.4995                                 | -20.20                               | 21.2244                                   | 189.13                                            |
| cc-pVTZ                              | 6.7586                                 | 50.32                              | -0.5321                                 | -21.85                               | 21.1343                                   | 191.45                                            |
| pc-1                                 | 6.2787                                 | 48.93                              | -0.4981                                 | -20.27                               | 19.8330                                   | 178.90                                            |
| pc-2                                 | 6.9739                                 | 52.94                              | -0.5573                                 | -22.66                               | 20.9528                                   | 191.15                                            |
| pecS-2_ext                           | 7.4987                                 | 56.23                              | -0.5825                                 | -24.18                               | 22.1193                                   | 198.81                                            |
| pcS-2_ext                            | 7.4488                                 | 56.32                              | -0.5880                                 | -24.19                               | 21.9585                                   | 198.50                                            |

<sup>1</sup> These values are averaged.

**Table S14.** The dependency of the HALA effect (in ppm) from I atom on  $\sigma(^1\text{H})$  and  $\sigma(^{13}\text{C})$  in  $\text{C}_6\text{H}_5\text{I}$  (7) on the basis set used on hydrogen and carbon atom, respectively. Dyall.av3z is set on I atom.

| Basis set on hydrogen or carbon atom | $\alpha$ -HALA on $\sigma(^{13}\text{C})$ | $\beta$ -HALA on $\sigma(^{13}\text{C})$ | $\gamma$ -HALA on $\sigma(^{13}\text{C})$ | $\delta$ -HALA on $\sigma(^{13}\text{C})$ | $\gamma$ -HALA on $\sigma(^1\text{H})$ | $\delta$ -HALA on $\sigma(^1\text{H})$ | $\epsilon$ -HALA on $\sigma(^1\text{H})$ |
|--------------------------------------|-------------------------------------------|------------------------------------------|-------------------------------------------|-------------------------------------------|----------------------------------------|----------------------------------------|------------------------------------------|
| dyall.aae4z                          | 31.8004                                   | -0.7185                                  | 0.6348                                    | 1.2982                                    | -0.3866                                | 0.1623                                 | -0.0852                                  |
| aug-cc-pVTZ-J                        | 32.5801                                   | -0.8006                                  | 0.6502                                    | 1.4309                                    | -0.3724                                | 0.1719                                 | -0.1553                                  |
| ccJ-pVDZ                             | 31.7851                                   | -0.8092                                  | 0.6848                                    | 1.3252                                    | -0.3737                                | 0.1485                                 | -0.0764                                  |
| ccJ-pVTZ                             | 31.7297                                   | -0.8513                                  | 0.6543                                    | 1.2991                                    | -0.3775                                | 0.1538                                 | -0.0849                                  |
| pcJ-1                                | 32.0128                                   | -0.8531                                  | 0.6534                                    | 1.3145                                    | -0.3643                                | 0.1519                                 | -0.0770                                  |
| pcJ-2                                | 31.6822                                   | -0.8751                                  | 0.6169                                    | 1.2987                                    | -0.3671                                | 0.1669                                 | -0.0879                                  |
| pecJ-1                               | 31.0189                                   | -0.7964                                  | 0.6929                                    | 1.3221                                    | -0.3808                                | 0.1442                                 | -0.0760                                  |
| pecJ-2                               | 31.4156                                   | -0.8536                                  | 0.6548                                    | 1.3024                                    | -0.3836                                | 0.1578                                 | -0.0745                                  |
| pcS-1                                | 28.6056                                   | -0.8245                                  | 0.5429                                    | 1.1417                                    | -0.2924                                | 0.1291                                 | -0.0625                                  |
| pcS-2                                | 30.3237                                   | -0.9137                                  | 0.5550                                    | 1.2270                                    | -0.3397                                | 0.1583                                 | -0.0795                                  |
| pecS-1                               | 26.1807                                   | -0.7818                                  | 0.4240                                    | 1.0007                                    | -0.2874                                | 0.1364                                 | -0.0839                                  |
| pecS-2                               | 30.2980                                   | -0.9239                                  | 0.5651                                    | 1.2387                                    | -0.3477                                | 0.1546                                 | -0.0728                                  |
| dyall.v2z                            | 30.6829                                   | -0.7980                                  | 0.6118                                    | 1.2628                                    | -0.3390                                | 0.1537                                 | -0.0797                                  |
| dyall.v3z                            | 31.4477                                   | -0.8956                                  | 0.5959                                    | 1.2618                                    | -0.3716                                | 0.1617                                 | -0.0811                                  |
| cc-pVDZ                              | 30.6501                                   | -0.6775                                  | 0.7504                                    | 1.3440                                    | -0.2999                                | 0.1304                                 | -0.0584                                  |
| cc-pVTZ                              | 30.7067                                   | -0.7262                                  | 0.6851                                    | 1.2697                                    | -0.3339                                | 0.1443                                 | -0.0690                                  |
| pc-1                                 | 28.9778                                   | -0.7322                                  | 0.6370                                    | 1.2437                                    | -0.2917                                | 0.1325                                 | -0.0596                                  |
| pc-2                                 | 30.4226                                   | -0.8768                                  | 0.5930                                    | 1.2666                                    | -0.3406                                | 0.1552                                 | -0.0838                                  |
| pecS-2_ext                           | 31.8442                                   | -0.8723                                  | 0.6252                                    | 1.3120                                    | -0.3793                                | 0.1660                                 | -0.0799                                  |
| pcS-2_ext                            | 31.8387                                   | -0.8706                                  | 0.6184                                    | 1.2997                                    | -0.3706                                | 0.1671                                 | -0.0896                                  |

<sup>1</sup> These values are averaged.

**Table S15.** The dependencies of the SSCCs  $J_{\text{FC}}(^1\text{H}, ^{127}\text{I})$  and  $^1J_{\text{FC}}(^{13}\text{C}, ^{127}\text{I})$  (in Hz) in  $\text{C}_6\text{H}_5\text{I}$  (7) on the basis set used on hydrogen and carbon atom, respectively. Dyall.av3z is set on I atom.

| Basis set on hydrogen or carbon atom | $^1J_{\text{FC}}(^{13}\text{C}, ^{127}\text{I})$ | $^2J_{\text{FC}}(^{13}\text{C}, ^{127}\text{I})$ | $^3J_{\text{FC}}(^{13}\text{C}, ^{127}\text{I})$ | $^4J_{\text{FC}}(^{13}\text{C}, ^{127}\text{I})$ | $^3J_{\text{FC}}(^1\text{H}, ^{127}\text{I})$ | $^4J_{\text{FC}}(^1\text{H}, ^{127}\text{I})$ | $^5J_{\text{FC}}(^1\text{H}, ^{127}\text{I})$ |
|--------------------------------------|--------------------------------------------------|--------------------------------------------------|--------------------------------------------------|--------------------------------------------------|-----------------------------------------------|-----------------------------------------------|-----------------------------------------------|
| dyall.aae4z                          | -184.66                                          | 12.32                                            | 0.76                                             | -0.86                                            | 9.65                                          | 1.21                                          | 2.88                                          |
| aug-cc-pVTZ-J                        | -184.75                                          | 12.31                                            | 0.76                                             | -0.85                                            | 9.62                                          | 1.21                                          | 2.88                                          |
| ccJ-pVDZ                             | -184.11                                          | 12.04                                            | 0.72                                             | -0.85                                            | 9.50                                          | 1.20                                          | 2.87                                          |
| ccJ-pVTZ                             | -184.29                                          | 12.32                                            | 0.80                                             | -0.86                                            | 9.62                                          | 1.21                                          | 2.87                                          |
| pcJ-1                                | -184.46                                          | 11.91                                            | 0.57                                             | -0.82                                            | 9.36                                          | 1.16                                          | 2.86                                          |
| pcJ-2                                | -184.44                                          | 12.33                                            | 0.74                                             | -0.85                                            | 9.58                                          | 1.20                                          | 2.87                                          |
| pecJ-1                               | -180.90                                          | 12.17                                            | 0.83                                             | -0.88                                            | 9.72                                          | 1.25                                          | 2.88                                          |
| pecJ-2                               | -183.27                                          | 12.29                                            | 0.83                                             | -0.86                                            | 9.66                                          | 1.22                                          | 2.88                                          |
| pcS-1                                | -168.19                                          | 10.88                                            | 0.53                                             | -0.75                                            | 7.95                                          | 0.98                                          | 2.43                                          |
| pcS-2                                | -177.93                                          | 11.90                                            | 0.71                                             | -0.82                                            | 9.01                                          | 1.13                                          | 2.69                                          |
| pecS-1                               | -157.89                                          | 9.64                                             | 0.56                                             | -0.59                                            | 7.95                                          | 0.93                                          | 2.32                                          |

|            |         |       |      |       |      |      |      |
|------------|---------|-------|------|-------|------|------|------|
| pecS-2     | -177.98 | 11.89 | 0.72 | -0.83 | 9.04 | 1.13 | 2.70 |
| dyall.v2z  | -178.61 | 11.95 | 0.66 | -0.83 | 9.00 | 1.11 | 2.70 |
| dyall.v3z  | -183.02 | 12.21 | 0.75 | -0.85 | 9.47 | 1.19 | 2.83 |
| cc-pVDZ    | -176.79 | 11.52 | 0.69 | -0.81 | 8.17 | 1.04 | 2.49 |
| cc-pVTZ    | -177.93 | 11.88 | 0.77 | -0.83 | 8.77 | 1.11 | 2.62 |
| pc-1       | -168.08 | 10.79 | 0.51 | -0.74 | 7.96 | 1.00 | 2.45 |
| pc-2       | -177.93 | 11.89 | 0.71 | -0.82 | 9.01 | 1.13 | 2.70 |
| pecS-2_ext | -184.80 | 12.34 | 0.74 | -0.86 | 9.65 | 1.20 | 2.88 |
| pcS-2_ext  | -184.77 | 12.35 | 0.74 | -0.86 | 9.62 | 1.20 | 2.88 |

**Table S16.** The dependency of the HALA effect (in ppm) from Sb atom on  $\sigma(^1\text{H})$  and  $\sigma(^{13}\text{C})$  in  $\text{C}_5\text{H}_5\text{Sb}$  (**8**) on the basis set used on hydrogen and carbon atom, respectively. Dyall.av3z is set on Sb atom.

| Basis set on hydrogen or carbon atom | $\alpha$ -HALA on $\sigma(^{13}\text{C})$ | $\beta$ -HALA on $\sigma(^{13}\text{C})$ | $\gamma$ -HALA on $\sigma(^{13}\text{C})$ | $\beta$ -HALA on $\sigma(^1\text{H})$ | $\gamma$ -HALA on $\sigma(^1\text{H})$ | $\delta$ -HALA on $\sigma(^1\text{H})$ |
|--------------------------------------|-------------------------------------------|------------------------------------------|-------------------------------------------|---------------------------------------|----------------------------------------|----------------------------------------|
| dyall.aae4z                          | -1.2692                                   | 1.0172                                   | -7.1472                                   | -1.0931                               | -0.2688                                | -0.3414                                |
| aug-cc-pVTZ-J                        | -0.6004                                   | 1.0358                                   | -6.9200                                   | -1.0800                               | -0.2234                                | -0.3207                                |
| ccJ-pVDZ                             | -1.1068                                   | 0.9516                                   | -6.9503                                   | -0.9846                               | -0.2245                                | -0.3135                                |
| ccJ-pVTZ                             | -1.0491                                   | 0.9961                                   | -7.1219                                   | -1.0437                               | -0.2405                                | -0.3265                                |
| pcJ-1                                | -1.1348                                   | 0.9508                                   | -6.9452                                   | -0.9815                               | -0.2318                                | -0.3106                                |
| pcJ-2                                | -1.0738                                   | 0.9915                                   | -7.1691                                   | -1.0607                               | -0.2428                                | -0.3217                                |
| pecJ-1                               | -0.9756                                   | 0.9212                                   | -6.9075                                   | -0.9839                               | -0.2169                                | -0.3119                                |
| pecJ-2                               | -1.0340                                   | 0.9711                                   | -7.1457                                   | -1.0401                               | -0.2267                                | -0.3198                                |
| pcS-1                                | -1.3667                                   | 0.8517                                   | -6.5689                                   | -0.8811                               | -0.1896                                | -0.2887                                |
| pcS-2                                | -1.2316                                   | 0.9511                                   | -6.9349                                   | -1.0193                               | -0.2254                                | -0.3134                                |
| pecS-1                               | -2.4379                                   | 0.9357                                   | -6.3675                                   | -0.9091                               | -0.2540                                | -0.2963                                |
| pecS-2                               | -1.2881                                   | 0.9390                                   | -6.9075                                   | -1.0147                               | -0.2286                                | -0.3022                                |
| dyall.v2z                            | -1.2059                                   | 0.9925                                   | -6.8117                                   | -0.9664                               | -0.2194                                | -0.3034                                |
| dyall.v3z                            | -1.2028                                   | 1.0349                                   | -7.0369                                   | -1.0317                               | -0.2466                                | -0.3131                                |
| cc-pVDZ                              | -0.9259                                   | 0.9788                                   | -6.5493                                   | -0.8835                               | -0.1832                                | -0.2889                                |
| cc-pVTZ                              | -1.0287                                   | 0.9717                                   | -6.8585                                   | -0.9799                               | -0.2102                                | -0.3072                                |
| pc-1                                 | -1.1002                                   | 0.9257                                   | -6.3316                                   | -0.8788                               | -0.1872                                | -0.2843                                |
| pc-2                                 | -1.1613                                   | 0.9817                                   | -6.8749                                   | -1.0193                               | -0.2280                                | -0.3159                                |
| pecS-2_ext                           | -1.1810                                   | 0.9923                                   | -7.0527                                   | -1.0587                               | -0.2452                                | -0.3086                                |
| pcS-2_ext                            | -1.1587                                   | 0.9900                                   | -7.0630                                   | -1.0668                               | -0.2447                                | -0.3226                                |

**Table S17.** The dependencies of the SSCCs  $J_{\text{FC}}(^1\text{H}, ^{121}\text{Sb})$  and  $^1J_{\text{FC}}(^{13}\text{C}, ^{121}\text{Sb})$  (in Hz) in  $\text{C}_5\text{H}_5\text{Sb}$  (**8**) on the basis set used on hydrogen and carbon atom, respectively. Dyall.av3z is set on Sb atom.

| Basis set on hydrogen or carbon atom | $^1J_{\text{FC}}(^{13}\text{C}, ^{121}\text{Sb})$ | $^2J_{\text{FC}}(^{13}\text{C}, ^{121}\text{Sb})$ | $^3J_{\text{FC}}(^{13}\text{C}, ^{121}\text{Sb})$ | $^2J_{\text{FC}}(^1\text{H}, ^{121}\text{Sb})$ | $^3J_{\text{FC}}(^1\text{H}, ^{121}\text{Sb})$ | $^4J_{\text{FC}}(^1\text{H}, ^{121}\text{Sb})$ |
|--------------------------------------|---------------------------------------------------|---------------------------------------------------|---------------------------------------------------|------------------------------------------------|------------------------------------------------|------------------------------------------------|
| dyall.aae4z                          | -159.34                                           | -7.19                                             | 3.84                                              | 73.12                                          | 5.15                                           | 1.33                                           |
| aug-cc-pVTZ-J                        | -159.58                                           | -7.22                                             | 3.83                                              | 72.87                                          | 5.13                                           | 1.33                                           |
| ccJ-pVDZ                             | -157.80                                           | -7.43                                             | 3.79                                              | 71.96                                          | 4.96                                           | 1.39                                           |
| ccJ-pVTZ                             | -158.97                                           | -7.24                                             | 3.86                                              | 72.53                                          | 5.11                                           | 1.35                                           |
| pcJ-1                                | -157.26                                           | -7.62                                             | 3.64                                              | 71.64                                          | 4.89                                           | 1.36                                           |
| pcJ-2                                | -158.94                                           | -7.22                                             | 3.82                                              | 72.68                                          | 5.09                                           | 1.34                                           |
| pecJ-1                               | -155.48                                           | -7.36                                             | 3.87                                              | 72.52                                          | 5.05                                           | 1.41                                           |
| pecJ-2                               | -157.93                                           | -7.20                                             | 3.89                                              | 72.71                                          | 5.11                                           | 1.37                                           |
| pcS-1                                | -143.31                                           | -6.94                                             | 3.34                                              | 60.90                                          | 4.15                                           | 1.16                                           |
| pcS-2                                | -153.33                                           | -6.97                                             | 3.70                                              | 68.35                                          | 4.79                                           | 1.26                                           |
| pecS-1                               | -133.14                                           | -6.22                                             | 3.71                                              | 61.49                                          | 4.23                                           | 1.13                                           |
| pecS-2                               | -153.29                                           | -6.92                                             | 3.74                                              | 68.36                                          | 4.80                                           | 1.26                                           |
| dyall.v2z                            | -153.84                                           | -6.98                                             | 3.61                                              | 68.26                                          | 4.72                                           | 1.28                                           |
| dyall.v3z                            | -157.85                                           | -7.16                                             | 3.80                                              | 71.69                                          | 5.06                                           | 1.31                                           |
| cc-pVDZ                              | -151.76                                           | -7.25                                             | 3.84                                              | 61.44                                          | 4.27                                           | 1.18                                           |
| cc-pVTZ                              | -153.55                                           | -7.01                                             | 3.76                                              | 66.07                                          | 4.67                                           | 1.23                                           |
| pc-1                                 | -143.56                                           | -7.00                                             | 3.38                                              | 61.02                                          | 4.15                                           | 1.16                                           |
| pc-2                                 | -153.34                                           | -6.97                                             | 3.70                                              | 68.36                                          | 4.79                                           | 1.26                                           |
| pecS-2_ext                           | -159.17                                           | -7.19                                             | 3.88                                              | 73.00                                          | 5.12                                           | 1.35                                           |
| pcS-2_ext                            | -159.23                                           | -7.24                                             | 3.84                                              | 72.99                                          | 5.11                                           | 1.34                                           |

**Table S18.** The dependency of the HALA effect (in ppm) from Sn atom on  $\sigma(^1\text{H})$  and  $\sigma(^{13}\text{C})$  in  $\text{C}_5\text{H}_6\text{Sn}$  (**9**) on the basis set used on hydrogen and carbon atom, respectively. Dyall.av3z is set on Sn atom.

| Basis set on hydrogen or carbon atom | $\alpha$ -HALA on $\sigma(^{13}\text{C})$ | $\beta$ -HALA on $\sigma(^{13}\text{C})$ | $\gamma$ -HALA on $\sigma(^{13}\text{C})$ | $\alpha$ -HALA on $\sigma(^1\text{H})$ | $\beta$ -HALA on $\sigma(^1\text{H})$ | $\gamma$ -HALA on $\sigma(^1\text{H})$ | $\delta$ -HALA on $\sigma(^1\text{H})$ |
|--------------------------------------|-------------------------------------------|------------------------------------------|-------------------------------------------|----------------------------------------|---------------------------------------|----------------------------------------|----------------------------------------|
| dyall.aae4z                          | -4.9609                                   | 0.7002                                   | -0.7321                                   | -2.7287                                | -0.9199                               | -0.2348                                | -0.0889                                |
| aug-cc-pVTZ-J                        | -4.0240                                   | 0.9439                                   | -0.7460                                   | -2.6333                                | -0.8862                               | -0.1717                                | -0.0678                                |
| ccJ-pVDZ                             | -4.5409                                   | 0.8750                                   | -0.7810                                   | -2.5626                                | -0.7811                               | -0.1717                                | -0.0727                                |
| ccJ-pVTZ                             | -4.5954                                   | 0.8658                                   | -0.8153                                   | -2.6202                                | -0.8177                               | -0.1838                                | -0.0749                                |
| pcJ-1                                | -4.5672                                   | 0.8625                                   | -0.7814                                   | -2.5798                                | -0.7739                               | -0.1754                                | -0.0735                                |
| pcJ-2                                | -4.6130                                   | 0.8665                                   | -0.8155                                   | -2.6465                                | -0.8213                               | -0.1853                                | -0.0717                                |
| pecJ-1                               | -4.4563                                   | 0.8771                                   | -0.7740                                   | -2.5618                                | -0.7797                               | -0.1727                                | -0.0733                                |
| pecJ-2                               | -4.5973                                   | 0.8542                                   | -0.8341                                   | -2.6228                                | -0.8186                               | -0.1758                                | -0.0679                                |
| pcS-1                                | -4.4952                                   | 0.6992                                   | -0.7532                                   | -2.2850                                | -0.6802                               | -0.1431                                | -0.0622                                |
| pcS-2                                | -4.5835                                   | 0.8087                                   | -0.7715                                   | -2.5231                                | -0.7825                               | -0.1717                                | -0.0677                                |
| pecS-1                               | -4.5887                                   | 0.7216                                   | -0.6717                                   | -2.3205                                | -0.6668                               | -0.1596                                | -0.0706                                |

|            |         |        |         |         |         |         |         |
|------------|---------|--------|---------|---------|---------|---------|---------|
| pecS-2     | -4.6166 | 0.7827 | -0.7718 | -2.4950 | -0.7840 | -0.1753 | -0.0660 |
| dyall.v2z  | -4.4988 | 0.8548 | -0.7357 | -2.5019 | -0.7505 | -0.1689 | -0.0642 |
| dyall.v3z  | -4.6259 | 0.8760 | -0.7732 | -2.6219 | -0.8043 | -0.1851 | -0.0653 |
| cc-pVDZ    | -4.2387 | 0.9017 | -0.6883 | -2.2678 | -0.6881 | -0.1399 | -0.0593 |
| cc-pVTZ    | -4.4205 | 0.8451 | -0.7646 | -2.4363 | -0.7577 | -0.1572 | -0.0617 |
| pc-1       | -4.2386 | 0.8031 | -0.6666 | -2.2801 | -0.6784 | -0.1402 | -0.0576 |
| pc-2       | -4.5175 | 0.8436 | -0.7407 | -2.5212 | -0.7843 | -0.1744 | -0.0700 |
| pecS-2_ext | -4.6272 | 0.8433 | -0.7841 | -2.6233 | -0.8261 | -0.1909 | -0.0721 |
| pcS-2_ext  | -4.6095 | 0.8723 | -0.7692 | -2.6516 | -0.8260 | -0.1871 | -0.0717 |

**Table S19.** The dependencies of the SSCCs  $J_{\text{FC}}(^1\text{H}, ^{119}\text{Sb})$  and  $^1J_{\text{FC}}(^{13}\text{C}, ^{119}\text{Sb})$  (in Hz) in  $\text{C}_5\text{H}_6\text{Sn}$  (**9**) on the basis set used on hydrogen and carbon atom, respectively. Dyall.av3z is set on Sn atom.

| Basis set on hydrogen or carbon atom | $^1J_{\text{FC}}(^{13}\text{C}, ^{119}\text{Sn})$ | $^2J_{\text{FC}}(^{13}\text{C}, ^{119}\text{Sn})$ | $^3J_{\text{FC}}(^{13}\text{C}, ^{119}\text{Sn})$ | $^1J_{\text{FC}}(^1\text{H}, ^{119}\text{Sn})$ | $^2J_{\text{FC}}(^1\text{H}, ^{119}\text{Sn})$ | $^3J_{\text{FC}}(^1\text{H}, ^{119}\text{Sn})$ | $^4J_{\text{FC}}(^1\text{H}, ^{119}\text{Sn})$ |
|--------------------------------------|---------------------------------------------------|---------------------------------------------------|---------------------------------------------------|------------------------------------------------|------------------------------------------------|------------------------------------------------|------------------------------------------------|
| dyall.aae4z                          | -347.59                                           | 4.70                                              | -130.98                                           | -1615.44                                       | -90.47                                         | -126.73                                        | 11.42                                          |
| aug-cc-pVTZ-J                        | -347.13                                           | 4.59                                              | -130.89                                           | -1610.34                                       | -90.16                                         | -126.49                                        | 11.38                                          |
| ccJ-pVDZ                             | -353.03                                           | 4.54                                              | -129.36                                           | -1595.30                                       | -88.64                                         | -124.29                                        | 11.44                                          |
| ccJ-pVTZ                             | -348.78                                           | 4.56                                              | -130.71                                           | -1601.05                                       | -89.51                                         | -125.63                                        | 11.42                                          |
| pcJ-1                                | -352.24                                           | 4.39                                              | -128.53                                           | -1601.75                                       | -87.97                                         | -124.13                                        | 11.35                                          |
| pcJ-2                                | -347.30                                           | 4.59                                              | -130.70                                           | -1606.38                                       | -89.75                                         | -126.05                                        | 11.37                                          |
| pecJ-1                               | -347.67                                           | 4.67                                              | -128.60                                           | -1600.14                                       | -89.04                                         | -125.17                                        | 11.61                                          |
| pecJ-2                               | -347.17                                           | 4.61                                              | -130.12                                           | -1604.31                                       | -89.73                                         | -125.95                                        | 11.49                                          |
| pcS-1                                | -321.53                                           | 4.12                                              | -117.40                                           | -1363.77                                       | -74.81                                         | -105.63                                        | 9.67                                           |
| pcS-2                                | -335.06                                           | 4.44                                              | -126.12                                           | -1509.55                                       | -84.42                                         | -118.48                                        | 10.68                                          |
| pecS-1                               | -304.68                                           | 4.05                                              | -104.44                                           | -1378.91                                       | -75.74                                         | -106.10                                        | 9.66                                           |
| pecS-2                               | -336.16                                           | 4.63                                              | -126.28                                           | -1511.47                                       | -84.43                                         | -118.52                                        | 10.69                                          |
| dyall.v2z                            | -338.32                                           | 4.88                                              | -126.62                                           | -1520.16                                       | -84.02                                         | -118.23                                        | 10.75                                          |
| dyall.v3z                            | -344.58                                           | 4.64                                              | -129.78                                           | -1585.34                                       | -88.55                                         | -124.45                                        | 11.22                                          |
| cc-pVDZ                              | -337.23                                           | 4.42                                              | -124.14                                           | -1365.14                                       | -76.10                                         | -106.57                                        | 9.75                                           |
| cc-pVTZ                              | -336.40                                           | 4.37                                              | -126.25                                           | -1457.00                                       | -81.59                                         | -114.46                                        | 10.40                                          |
| pc-1                                 | -319.40                                           | 3.87                                              | -117.08                                           | -1363.38                                       | -75.31                                         | -105.95                                        | 9.65                                           |
| pc-2                                 | -335.05                                           | 4.43                                              | -126.10                                           | -1509.52                                       | -84.44                                         | -118.50                                        | 10.68                                          |
| pecS-2_ext                           | -348.93                                           | 4.80                                              | -131.07                                           | -1614.06                                       | -90.14                                         | -126.62                                        | 11.44                                          |
| pcS-2_ext                            | -347.90                                           | 4.60                                              | -130.93                                           | -1613.47                                       | -90.13                                         | -126.60                                        | 11.42                                          |

**Table S20.** The dependency of the HALA effect (in ppm) from In atom on  $\sigma(^1\text{H})$  and  $\sigma(^{13}\text{C})$  in  $\text{C}_6\text{H}_5\text{InH}_2$  (**10**) on the basis set used on hydrogen and carbon atom, respectively. Dyall.av3z is set on In atom.

| Basis set on hydrogen or carbon atom | $\alpha$ -HALA on $\sigma(^{13}\text{C})$ | $\beta$ -HALA on $\sigma(^{13}\text{C})$ | $\gamma$ -HALA on $\sigma(^{13}\text{C})$ | $\delta$ -HALA on $\sigma(^{13}\text{C})$ | $\alpha$ -HALA on $\sigma(^1\text{H})$ | $\beta$ -HALA on $\sigma(^1\text{H})$ | $\gamma$ -HALA on $\sigma(^1\text{H})$ | $\delta$ -HALA on $\sigma(^1\text{H})$ |
|--------------------------------------|-------------------------------------------|------------------------------------------|-------------------------------------------|-------------------------------------------|----------------------------------------|---------------------------------------|----------------------------------------|----------------------------------------|
| dyall.aae4z                          | -10.0811                                  | 0.7542                                   | 0.6423                                    | 1.1499                                    | -5.8460                                | -0.1192                               | -0.1066                                | -0.0522                                |

|               |         |        |        |        |         |         |         |         |
|---------------|---------|--------|--------|--------|---------|---------|---------|---------|
| aug-cc-pVTZ-J | -9.8215 | 0.8054 | 0.6874 | 1.2481 | -5.9655 | -0.1134 | -0.1202 | -0.0889 |
| ccJ-pVDZ      | -8.4431 | 0.5524 | 0.5369 | 1.0690 | -5.4138 | -0.1175 | -0.0856 | -0.0354 |
| ccJ-pVTZ      | -8.4676 | 0.5401 | 0.5330 | 1.0661 | -5.4776 | -0.1206 | -0.0864 | -0.0370 |
| pcJ-1         | -9.5902 | 0.7941 | 0.6382 | 1.1393 | -5.8345 | -0.1172 | -0.0884 | -0.0350 |
| pcJ-2         | -9.6015 | 0.7981 | 0.6507 | 1.1505 | -5.9148 | -0.1221 | -0.0910 | -0.0313 |
| pecJ-1        | -9.5279 | 0.7929 | 0.6313 | 1.1369 | -5.8776 | -0.1206 | -0.0927 | -0.0389 |
| pecJ-2        | -9.6384 | 0.7951 | 0.6418 | 1.1485 | -5.9187 | -0.1196 | -0.0883 | -0.0306 |
| pcS-1         | -8.9347 | 0.7107 | 0.5284 | 0.9951 | -5.0595 | -0.1021 | -0.0772 | -0.0298 |
| pcS-2         | -9.3996 | 0.7097 | 0.5757 | 1.0896 | -5.5944 | -0.1157 | -0.0842 | -0.0261 |
| pecS-1        | -8.5659 | 0.6855 | 0.5335 | 0.9567 | -5.0829 | -0.1057 | -0.0758 | -0.0309 |
| pecS-2        | -9.4725 | 0.6900 | 0.5701 | 1.0928 | -5.5958 | -0.1160 | -0.0827 | -0.0283 |
| dyall.v2z     | -9.3273 | 0.8404 | 0.6381 | 1.1027 | -5.5828 | -0.1144 | -0.0854 | -0.0323 |
| dyall.v3z     | -9.6300 | 0.7503 | 0.5872 | 1.1039 | -5.8413 | -0.1187 | -0.0859 | -0.0239 |
| cc-pVDZ       | -8.0377 | 0.5909 | 0.5797 | 1.0904 | -4.7189 | -0.1013 | -0.0745 | -0.0297 |
| cc-pVTZ       | -8.1519 | 0.5728 | 0.5481 | 1.0662 | -5.0367 | -0.1102 | -0.0802 | -0.0329 |
| pc-1          | -8.7710 | 0.7709 | 0.6196 | 1.0833 | -5.0574 | -0.0995 | -0.0752 | -0.0267 |
| pc-2          | -9.3482 | 0.7434 | 0.6136 | 1.1276 | -5.5930 | -0.1159 | -0.0875 | -0.0306 |
| pecS-2_ext    | -9.6597 | 0.8046 | 0.6421 | 1.1338 | -5.9348 | -0.1222 | -0.0885 | -0.0323 |
| pcS-2_ext     | -9.6433 | 0.7940 | 0.6266 | 1.1417 | -5.9395 | -0.1222 | -0.0914 | -0.0320 |

**Table S21.** The dependencies of the SSCCs  $J_{\text{FC}}(^1\text{H}, ^{115}\text{In})$  and  $^1J_{\text{FC}}(^{13}\text{C}, ^{115}\text{In})$  (in Hz) in  $\text{C}_6\text{H}_5\text{InH}_2$  (**10**) on the basis set used on hydrogen and carbon atom, respectively. Dyall.av3z is set on Sn atom.

| Basis set on hydrogen or carbon atom | $^1J_{\text{FC}}(^{13}\text{C}, ^{115}\text{In})$ | $^2J_{\text{FC}}(^{13}\text{C}, ^{115}\text{In})$ | $^3J_{\text{FC}}(^{13}\text{C}, ^{115}\text{In})$ | $^4J_{\text{FC}}(^{13}\text{C}, ^{115}\text{In})$ | $^1J_{\text{FC}}(^1\text{H}, ^{115}\text{In})$ | $^3J_{\text{FC}}(^1\text{H}, ^{115}\text{In})$ | $^4J_{\text{FC}}(^1\text{H}, ^{115}\text{In})$ | $^5J_{\text{FC}}(^1\text{H}, ^{115}\text{In})$ |
|--------------------------------------|---------------------------------------------------|---------------------------------------------------|---------------------------------------------------|---------------------------------------------------|------------------------------------------------|------------------------------------------------|------------------------------------------------|------------------------------------------------|
| dyall.aae4z                          | 281.29                                            | 30.59                                             | 25.52                                             | -3.01                                             | 870.13                                         | 32.26                                          | 6.36                                           | 2.52                                           |
| aug-cc-pVTZ-J                        | 281.29                                            | 30.65                                             | 25.55                                             | -3.02                                             | 867.13                                         | 32.13                                          | 6.36                                           | 2.52                                           |
| ccJ-pVDZ                             | 282.18                                            | 30.28                                             | 25.54                                             | -3.03                                             | 856.02                                         | 31.95                                          | 6.31                                           | 2.59                                           |
| ccJ-pVTZ                             | 281.57                                            | 30.61                                             | 25.60                                             | -3.03                                             | 861.56                                         | 32.07                                          | 6.34                                           | 2.53                                           |
| pcJ-1                                | 281.85                                            | 29.88                                             | 25.30                                             | -3.02                                             | 859.46                                         | 31.68                                          | 6.03                                           | 2.76                                           |
| pcJ-2                                | 280.51                                            | 30.48                                             | 25.49                                             | -3.01                                             | 865.73                                         | 32.10                                          | 6.33                                           | 2.53                                           |
| pecJ-1                               | 278.29                                            | 30.05                                             | 25.43                                             | -3.01                                             | 857.99                                         | 32.37                                          | 6.38                                           | 2.58                                           |
| pecJ-2                               | 280.26                                            | 30.44                                             | 25.50                                             | -3.02                                             | 863.08                                         | 32.21                                          | 6.37                                           | 2.56                                           |
| pcS-1                                | 257.20                                            | 27.25                                             | 23.06                                             | -2.76                                             | 731.88                                         | 26.95                                          | 5.13                                           | 2.34                                           |
| pcS-2                                | 270.63                                            | 29.41                                             | 24.59                                             | -2.91                                             | 813.64                                         | 30.19                                          | 5.95                                           | 2.38                                           |
| pecS-1                               | 243.15                                            | 26.70                                             | 20.56                                             | -2.15                                             | 742.07                                         | 27.03                                          | 5.00                                           | 2.13                                           |
| pecS-2                               | 271.68                                            | 29.45                                             | 24.50                                             | -2.90                                             | 814.28                                         | 30.22                                          | 5.92                                           | 2.39                                           |
| dyall.v2z                            | 272.30                                            | 29.37                                             | 24.46                                             | -2.89                                             | 854.75                                         | 31.79                                          | 6.16                                           | 2.51                                           |
| dyall.v3z                            | 278.80                                            | 30.31                                             | 25.29                                             | -2.99                                             | 853.98                                         | 31.68                                          | 6.24                                           | 2.49                                           |
| cc-pVDZ                              | 270.65                                            | 29.21                                             | 24.61                                             | -2.92                                             | 731.94                                         | 27.33                                          | 5.45                                           | 2.25                                           |
| cc-pVTZ                              | 271.74                                            | 29.61                                             | 24.74                                             | -2.93                                             | 783.88                                         | 29.20                                          | 5.78                                           | 2.31                                           |
| pc-1                                 | 256.27                                            | 27.39                                             | 23.13                                             | -2.75                                             | 731.66                                         | 26.91                                          | 5.21                                           | 2.35                                           |
| pc-2                                 | 270.61                                            | 29.42                                             | 24.59                                             | -2.91                                             | 813.63                                         | 30.18                                          | 5.95                                           | 2.38                                           |
| pecS-2_ext                           | 282.04                                            | 30.57                                             | 25.43                                             | -3.01                                             | 869.50                                         | 32.28                                          | 6.33                                           | 2.56                                           |
| pcS-2_ext                            | 281.02                                            | 30.54                                             | 25.53                                             | -3.02                                             | 869.50                                         | 32.24                                          | 6.36                                           | 2.54                                           |

**Table S22.** The dependency of the HALA effect (in ppm) from Te atom on  $\sigma(^1\text{H})$  and  $\sigma(^{13}\text{C})$  in  $\text{C}_4\text{H}_4\text{Te}$  (**11**) on the basis set used on hydrogen and carbon atom, respectively. Dyall.av3z is set on Te atom.

| Basis set on hydrogen or carbon atom | $\alpha$ -HALA on $\sigma(^{13}\text{C})$ | $\beta$ -HALA on $\sigma(^{13}\text{C})$ | $\beta$ -HALA on $\sigma(^1\text{H})$ | $\gamma$ -HALA on $\sigma(^1\text{H})$ |
|--------------------------------------|-------------------------------------------|------------------------------------------|---------------------------------------|----------------------------------------|
| dyall.aae4z                          | 8.5279                                    | -5.2057                                  | -1.2085                               | -0.8298                                |
| aug-cc-pVTZ-J                        | 8.8382                                    | -5.2318                                  | -1.2374                               | -0.6279                                |
| ccJ-pVDZ                             | 8.7024                                    | -5.2509                                  | -1.1885                               | -0.6499                                |
| ccJ-pVTZ                             | 8.6169                                    | -5.3112                                  | -1.2200                               | -0.6672                                |
| pcJ-1                                | 8.6256                                    | -5.2465                                  | -1.1917                               | -0.6444                                |
| pcJ-2                                | 8.5143                                    | -5.3173                                  | -1.2314                               | -0.6737                                |
| pecJ-1                               | 8.6926                                    | -5.2046                                  | -1.1824                               | -0.6557                                |
| pecJ-2                               | 8.5877                                    | -5.3225                                  | -1.2183                               | -0.6561                                |
| pcS-1                                | 7.3542                                    | -4.8419                                  | -1.0555                               | -0.5626                                |
| pcS-2                                | 7.9685                                    | -5.1309                                  | -1.1775                               | -0.6403                                |
| pecS-1                               | 6.0521                                    | -4.3191                                  | -1.0501                               | -0.5853                                |
| pecS-2                               | 8.0251                                    | -5.1523                                  | -1.1779                               | -0.6579                                |
| dyall.v2z                            | 7.5306                                    | -4.8291                                  | -1.0845                               | -0.5736                                |
| dyall.v3z                            | 8.5249                                    | -5.2449                                  | -1.1917                               | -0.6961                                |
| cc-pVDZ                              | 7.8836                                    | -4.7433                                  | -0.9995                               | -0.5142                                |
| cc-pVTZ                              | 8.3487                                    | -5.0827                                  | -1.1180                               | -0.6397                                |
| pc-1                                 | 7.6867                                    | -4.7292                                  | -1.0539                               | -0.5578                                |
| pc-2                                 | 8.0570                                    | -5.0874                                  | -1.1772                               | -0.6409                                |
| pecS-2_ext                           | 8.5773                                    | -5.3063                                  | -1.2382                               | -0.6954                                |
| pcS-2_ext                            | 8.5305                                    | -5.2821                                  | -1.2367                               | -0.6762                                |

**Table S23.** The dependencies of the SSCCs  $J_{\text{FC}}(^1\text{H}, ^{125}\text{Te})$  and  $^1J_{\text{FC}}(^{13}\text{C}, ^{125}\text{Te})$  (in Hz) in  $\text{C}_4\text{H}_4\text{Te}$  (**11**) on the basis set used on hydrogen and carbon atom, respectively. Dyall.av3z is set on Sn atom.

| Basis set on hydrogen or carbon atom | $^1J_{\text{FC}}(^{13}\text{C}, ^{125}\text{Te})$ | $^2J_{\text{FC}}(^{13}\text{C}, ^{125}\text{Te})$ | $^2J_{\text{FC}}(^1\text{H}, ^{125}\text{Te})$ | $^3J_{\text{FC}}(^1\text{H}, ^{125}\text{Te})$ |
|--------------------------------------|---------------------------------------------------|---------------------------------------------------|------------------------------------------------|------------------------------------------------|
| dyall.aae4z                          | 204.20                                            | -0.41                                             | -106.19                                        | -19.94                                         |
| aug-cc-pVTZ-J                        | 204.47                                            | -0.38                                             | -105.85                                        | -19.89                                         |
| ccJ-pVDZ                             | 202.81                                            | -0.13                                             | -104.31                                        | -19.41                                         |
| ccJ-pVTZ                             | 203.73                                            | -0.48                                             | -105.33                                        | -19.76                                         |
| pcJ-1                                | 202.29                                            | 0.24                                              | -103.79                                        | -19.30                                         |
| pcJ-2                                | 203.72                                            | -0.42                                             | -105.56                                        | -19.79                                         |
| pecJ-1                               | 199.34                                            | -0.46                                             | -105.10                                        | -19.65                                         |
| pecJ-2                               | 202.34                                            | -0.57                                             | -105.57                                        | -19.81                                         |
| pcS-1                                | 184.36                                            | 0.21                                              | -88.25                                         | -16.41                                         |
| pcS-2                                | 196.52                                            | -0.41                                             | -99.26                                         | -18.61                                         |
| pecS-1                               | 173.56                                            | 0.59                                              | -89.32                                         | -16.40                                         |
| pecS-2                               | 196.62                                            | -0.46                                             | -99.26                                         | -18.62                                         |
| dyall.v2z                            | 197.25                                            | -0.33                                             | -99.19                                         | -18.58                                         |
| dyall.v3z                            | 202.37                                            | -0.41                                             | -104.14                                        | -19.58                                         |



|            |        |       |         |        |
|------------|--------|-------|---------|--------|
| cc-pVDZ    | 195.20 | -0.07 | -89.24  | -16.72 |
| cc-pVTZ    | 196.77 | -0.45 | -95.98  | -18.04 |
| pc-1       | 184.64 | 0.29  | -88.43  | -16.45 |
| pc-2       | 196.54 | -0.40 | -99.27  | -18.61 |
| pecS-2_ext | 204.16 | -0.48 | -106.04 | -19.88 |
| pcS-2_ext  | 204.09 | -0.42 | -106.01 | -19.88 |
